# Supplementary material
Source: publisher figshare collection journal article supplement (https://gsajournals.figshare.com/articles/dataset/_/6667481)
Supplement: Supplementary file 1 [file 3]

**Table S1.** List of abbreviations.

| <b>Abbreviation</b> | <b>Item</b>                                                           |
|---------------------|-----------------------------------------------------------------------|
| BLUEs               | Best linear unbiased estimates                                        |
| BLUP                | Best linear unbiased prediction                                       |
| CG                  | Campan Galade                                                         |
| cLe                 | Combined library exclusive                                            |
| cLi                 | Combined library inclusive                                            |
| DH                  | Doubled-haploid                                                       |
| DHL                 | Doubled-haploid library                                               |
| EF                  | Elite flint                                                           |
| GB                  | Gelber Badischer                                                      |
| GBLUP               | Genomic best linear unbiased prediction                               |
| GP                  | Genomic prediction                                                    |
| $h^2$               | Heritability                                                          |
| LD                  | Linkage disequilibrium                                                |
| LOOCV               | Leave-one-out cross-validation                                        |
| LPS                 | Linkage phase similarity                                              |
| LwL                 | Library with Library                                                  |
| PS                  | Prediction set                                                        |
| QTL                 | Quantitative trait loci                                               |
| RT                  | Rheintaler                                                            |
| SF                  | Strenzfelder                                                          |
| sL                  | Single library                                                        |
| SM                  | Satu Mare                                                             |
| SV                  | Simple validation                                                     |
| TS                  | Training set                                                          |
| WA                  | Walliser                                                              |
| $\rho$              | Prediction accuracy                                                   |
| $\theta_{ii^*}$     | Proportion of polymorphic markers between populations $i$ and $i^*$ . |
