# Supplementary material
Source: publisher figshare collection journal article supplement (https://gsajournals.figshare.com/articles/dataset/_/6667481)
Supplement: Supplementary file 2 [file 3]

**Table S4.** Prediction accuracy ( $\rho \pm$  standard error) of seven agronomic traits from genomic prediction (GP) for the scenario cLe obtained with GBLUP by simple validation (SV). The combination comprised  $N_i = 19$  lines from each of the six doubled-haploid libraries (DHL) and the prediction set of each DHL comprised the remaining lines.

| Trait            | EF         | GB         | SF         | SM         | WA         | CG         | RT         |
|------------------|------------|------------|------------|------------|------------|------------|------------|
| Early vigor      | 0.11±0.13  | 0.10±0.12  | 0.29±0.12  | -0.02±0.11 | -0.03±0.10 | 0.30±0.22  | 0.10±0.16  |
| Female flowering | 0.18±0.14  | -0.01±0.13 | -0.01±0.14 | -0.21±0.09 | 0.13±0.10  | 0.03±0.21  | 0.06±0.20  |
| Fusarium ear rot | 0.22±0.13  | 0.10±0.15  | 0.11±0.15  | 0.28±0.08  | -0.01±0.10 | 0.21±0.25  | 0.17±0.15  |
| Plant height     | -0.00±0.17 | 0.18±0.14  | 0.24±0.12  | 0.14±0.10  | -0.16±0.11 | -0.07±0.25 | 0.17±0.18  |
| Grain yield      | 0.09±0.14  | -0.04±0.14 | 0.19±0.13  | -0.02±0.10 | 0.15±0.10  | 0.27±0.25  | -0.10±0.16 |
| Oil content      | 0.10±0.12  | -0.03±0.14 | 0.20±0.12  | 0.21±0.10  | 0.22±0.10  | 0.29±0.22  | -0.16±0.19 |
| Protein content  | -0.03±0.12 | 0.11±0.14  | -0.02±0.14 | -0.20±0.09 | -0.01±0.10 | -0.08±0.22 | 0.22±0.15  |
