# Supplementary material
Source: publisher figshare collection journal article supplement (https://gsajournals.figshare.com/articles/dataset/_/6667481)
Supplement: Supplementary file 3 [file 3]

**Table S2.** Overview of the different scenarios used for genomic prediction (GP), brief description, mathematical description, validation scheme, sample size ( $N_i$ ) and composition of the training set.

| Scenario   |                                           | Description                                                         | Math.                                                       | Validation scheme <sup>†</sup> | Sample size ( $N_i$ ) and TS composition                                                                                        |
|------------|-------------------------------------------|---------------------------------------------------------------------|-------------------------------------------------------------|--------------------------------|---------------------------------------------------------------------------------------------------------------------------------|
| <b>sL</b>  | one-library                               | GP within a single library                                          | $L_i \rightarrow L_i$                                       | LOOCV                          | a) $N_i = 50$<br>b) $N_i = 20, \dots, 90$                                                                                       |
| <b>LwL</b> | Library-with-library                      | GP trained on a single library to predict another library           | $L_i \rightarrow L_{i*}$                                    | SV                             | a) $N_i = 50$<br>b) $N_i = 90$                                                                                                  |
| <b>cLi</b> | Library-with-combined-libraries-inclusive | GP combining libraries for the TS, including the library used as PS | $\bigcup_{i \in I} L_i \rightarrow L_i$                     | LOOCV                          | $50 \times 4 = 200$<br>$I = \{\text{GB, SF, SM, WA}\}$                                                                          |
| <b>cLe</b> | Library-with-combined-libraries-exclusive | GP combining libraries for the TS, excluding the library used as PS | $\bigcup_{i \in I \setminus \{i'\}} L_i \rightarrow L_{i*}$ | SV                             | a) $50 \times 3 = 150$<br>$I = \{\text{GB, SF, SM, WA}\}$<br>b) $19 \times 5 = 95$ ,<br>$I = \{\text{GB, SF, SM, WA, CG, RT}\}$ |

<sup>†</sup> LOOCV = leave-one-out cross-validation; SV = simple validation
