# Supplementary material
Source: publisher figshare collection journal article supplement (https://gsajournals.figshare.com/articles/dataset/_/6667481)
Supplement: Supplementary file 4 [file 3]

**Table S3.** Forecasted prediction accuracy (forecasted value  $\pm$  standard error) using deterministic equations devised by Wientjes ( $\rho^W$ ) and Daetwyler ( $\rho^D$ ) for seven agronomic traits for scenario sL using  $N_i = 50$  sampled from the elite flint (EF) lines, or doubled-haploid (DH) lines from the landraces GB, SF, SM, and WA, as well as the means across traits.

| Trait            | EF        | Landraces |           |           |           | Mean        |
|------------------|-----------|-----------|-----------|-----------|-----------|-------------|
|                  |           | GB        | SF        | SM        | WA        |             |
|                  |           | $\rho^W$  |           |           |           |             |
| Early vigor      | 0.43±0.15 | 0.21±0.04 | 0.35±0.07 | 0.37±0.07 | 0.45±0.08 | <b>0.35</b> |
| Female flowering | 0.39±0.14 | 0.16±0.03 | 0.31±0.07 | 0.37±0.07 | 0.37±0.07 | <b>0.30</b> |
| Fusarium ear rot | 0.58±0.22 | 0.27±0.04 | 0.32±0.07 | 0.38±0.07 | 0.44±0.08 | <b>0.35</b> |
| Plant height     | 0.50±0.18 | 0.23±0.04 | 0.36±0.07 | 0.33±0.06 | 0.42±0.08 | <b>0.33</b> |
| Grain yield      | 0.49±0.18 | 0.22±0.04 | 0.34±0.07 | 0.36±0.07 | 0.41±0.07 | <b>0.33</b> |
| Oil content      | 0.40±0.14 | 0.16±0.03 | 0.32±0.07 | 0.35±0.07 | 0.36±0.06 | <b>0.30</b> |
| Protein content  | 0.48±0.18 | 0.21±0.04 | 0.33±0.07 | 0.35±0.07 | 0.42±0.08 | <b>0.33</b> |
|                  |           | $\rho^D$  |           |           |           |             |
| Early vigor      | 0.55±0.08 | 0.16±0.07 | 0.25±0.08 | 0.33±0.07 | 0.42±0.08 | <b>0.29</b> |
| Female flowering | 0.56±0.08 | 0.17±0.08 | 0.31±0.09 | 0.34±0.07 | 0.49±0.08 | <b>0.33</b> |
| Fusarium ear rot | 0.31±0.09 | 0.13±0.06 | 0.30±0.09 | 0.32±0.07 | 0.44±0.08 | <b>0.30</b> |
| Plant height     | 0.51±0.09 | 0.15±0.07 | 0.24±0.08 | 0.37±0.07 | 0.46±0.09 | <b>0.30</b> |
| Grain yield      | 0.51±0.09 | 0.15±0.07 | 0.27±0.08 | 0.35±0.07 | 0.47±0.09 | <b>0.31</b> |
| Oil content      | 0.56±0.08 | 0.18±0.08 | 0.30±0.09 | 0.36±0.07 | 0.49±0.08 | <b>0.33</b> |
| Protein content  | 0.52±0.09 | 0.16±0.07 | 0.29±0.09 | 0.36±0.07 | 0.45±0.08 | <b>0.32</b> |
